# Supplementary material for: A microbial perspective on the local influence of Arctic rivers and estuaries on Hudson Bay (Canada)
Source: Oxford University Press journal article supplement (doi:10.1525/elementa.2021.00009), 2022-01-01
Supplement: data_3_sizeindicatorsilva_blastaccept.xlsx [file data_3_sizeindicatorsilva_blastaccept.xlsx]

## Sheet: Size Fraction sorted
Data S3	Region	Habitat	OTU ID	Stat	P-value	MRA (%)	Fraction	Proportion	Phyla	Order	closest blast Silva id	notes
	Nelson	Estuary	OTU_310_Ilumatobacter	0.87	0.003	0.1	Large	79.8	Acidimicrobia	Microtrichales	Illumatobacter
	Nelson	Marine	OTU_59_Sva0996_marine_group*	0.89	0.001	0.55	Large	83.5	Acidimicrobia	Microtrichales	Sva0996_marine_group
	Nelson	Estuary	OTU_600_Candidatus_Aquiluna	0.91	0.003	0.3	Large	78.6	Actinobacteria	Micrococcales	Can. Aquiluna
	Nelson	Estuary	OTU_180_Crocinitomicaceae_uncultured	0.83	0.003	1.1	Large	77.5	Bacteroidia	Flavobacteriales	Crocinitomicaceae_UC_Env
	Nelson	Estuary	OTU_2129_Flavobacteriaceae_uncultured	0.9	0.003	0.1	Large	76.4	Bacteroidia	Flavobacteriales	Flavobacteriaceae_UC_Env
	Nelson	Estuary	OTU_548_Sporichthyaceae_hgcI_clade	0.82	0.003	1.4	Large	74.2	Actinobacteria	Frankiales	Sporichthyaceae hgcl
	Nelson	Marine	OTU_119_Loktanella	0.81	0.001	0.13	Large	78.3	Alphaproteobacteria	Rhodobacterales	Roseobacter clade NAC11-7
	Nelson	Marine	OTU_427_Saprospiraceae uncultured	0.95	0.001	0.53	Large	82.7	Bacteroidia	Chitinophagales	Saprospiraceae UC_Env
	Nelson	Marine	OTU_5384_	0.94	0.001	0.68	Large	84	Bacteroidia	Chitinophagales	Saprospiraceae UC_Env
	Nelson	Estuary	OTU_251_SL56_marine_group_ge	0.81	0.009	0.2	Large	73.2	Chloroflexi	SL56 marine Group	SL56MG_unclassified
	Nelson	Marine	OTU_2307_Cryomorphaceae uncultured	0.83	0.001	0.11	Large	66.5	Bacteroidia	Flavobacteriales	Cryomorphaceae UC_Env
	Nelson	Estuary	OTU_471_Candidatus_Aquiluna	0.92	0.003	0.4	Large	72.5	Actinobacteria	Micrococcales	Can. Aquiluna	Actinobacteriota
	Nelson	Marine	OTU_876_Flavobacteriaceae_unclassified	0.82	0.001	0.28	Large	77.6	Bacteroidia	Flavobacteriales	Flavobacteriaceae_unclassified	0.96
	Nelson	Marine	OTU_953_Flavobacteriaceae uncultured	0.8	0.001	0.14	Large	75.8	Bacteroidia	Flavobacteriales	Flavobacteriaceae_unclassified	0.95
	Nelson	Marine	OTU_1255_Flavobacteriaceae_unclassified	0.82	0.001	0.31	Large	66.2	Bacteroidia	Flavobacteriales	Formosa
	Churchill	Marine	OTU_202_ Fluviicola	0.82	0.004	0.26	Large	74.6	Bacteroidia	Flavobacteriales	Fuviicola
	Nelson	Marine	OTU_172_Lutibacter	0.83	0.001	0.15	Large	71.4	Bacteroidia	Flavobacteriales	Lutibacter UC_Env
	Churchill	Marine	OTU_1449_ Flavobacteriaceae_unclassified	0.86	0.004	0.6	Large	75.5	Bacteroidia	Flavobacteriales	NS4 marine group
	Nelson	Marine	OTU_1449_Flavobacteriaceae_unclassified	0.81	0.001	0.38	Large	84.3	Bacteroidia	Flavobacteriales	NS4 marine group
	Churchill	Marine	OTU_254_ Ulvibacter	0.88	0.004	9.77	Large	77	Bacteroidia	Flavobacteriales	Ulvibacter
	Nelson	Marine	OTU_254_Ulvibacter	0.83	0.001	5.54	Large	85.1	Bacteroidia	Flavobacteriales	Ulvibacter
	Churchill	Marine	OTU_494_ Ulvibacter	0.84	0.007	0.12	Large	73.6	Bacteroidia	Flavobacteriales	Ulvibacter
	Nelson	Marine	OTU_494_Ulvibacter	0.8	0.001	0.17	Large	83.5	Bacteroidia	Flavobacteriales	Ulvibacter
	Churchill	Marine	OTU_521_ Ulvibacter	0.89	0.004	0.2	Large	78.2	Bacteroidia	Flavobacteriales	Ulvibacter
	Churchill	Marine	OTU_6833_ Flavobacteriaceae_unclassified	0.84	0.004	0.41	Large	75.3	Bacteroidia	Flavobacteriales	Ulvibacter
	Nelson	Marine	OTU_6833_Flavobacteriaceae_unclassified	0.85	0.001	0.25	Large	86.8	Bacteroidia	Flavobacteriales	Ulvibacter
	Nelson	Marine	OTU_2518_NS11-12_marine_group_ge	0.92	0.001	0.27	Large	81	Bacteroidia	Sphingobacteriales	NS11-12 marine group
	Nelson	Estuary	OTU_214_Sporichthyaceae_hgcI_clade	0.88	0.003	0.2	Large	72.4	Actinobacteria	Frankiales	Sporichthyaceae hgcl
	Nelson	Marine	OTU_45_NS11-12_marine_group_ge	0.93	0.001	2.09	Large	81.2	Bacteroidia	Sphingobacteriales	NS11-12 marine group
	Nelson	Estuary	OTU_45_NS11-12_marine_group_ge	0.89	0.003	2.6	Large	72.2	Bacteroidia	Sphingobacteriales	NS11-12 marine group
	Nelson	Estuary	OTU_2518_NS11-12_marine_group_ge	0.83	0.003	0.2	Large	71.4	Bacteroidia	Sphingobacteriales	NS11-12 marine group
	Nelson	Marine	OTU_1096_Halieaceae_unclassified	0.83	0.001	0.48	Large	86.5	Gammaproteobacteria	Pseudomonadales	Halieaceae OM60(NOR5)
	Nelson	Estuary	OTU_1096_Halieaceae_unclassified	0.82	0.01	0.2	Large	65.6	Gammaproteobacteria	Pseudomonadales	Halieaceae OM60(NOR5)
	Nelson	Marine	OTU_122_Spongiibacteraceae_unclassified	0.84	0.001	0.53	Large	86.3	Gammaproteobacteria	Pseudomonadales	Spongiibacteraceae BD1-7
	Nelson	Marine	OTU_5294_BD1-7_clade	0.83	0.001	0.16	Large	85.8	Gammaproteobacteria	Pseudomonadales	Spongiibacteraceae BD1-7
	Nelson	Marine	OTU_4270_	0.85	0.001	0.15	Large	88.6	Gammaproteobacteria	Steroidobacterales	Woeseia
	Churchill	Marine	OTU_158_ Alphaproteobacteria_ uncultured_ge	0.84	0.004	0.12	Small	75	Alphaproteobacteria	Defluviicoccales	unclassified	0.97
	Churchill	Marine	OTU_382_ SAR116_clade_ge	0.94	0.004	0.24	Small	75	Alphaproteobacteria	Puniceispirillales	SAR116 clade
	Nelson	Marine	OTU_4268_SAR116_clade_ge	0.92	0.001	0.74	Small	73.2	Alphaproteobacteria	Puniceispirillales	SAR116 clade
	Churchill	Marine	OTU_1620_ SAR11_ Clade_I_ge*	0.84	0.004	0.2	Small	66.3	Alphaproteobacteria	Rhodobacterales	Rhodobacteraceae unclassified
	Churchill	Marine	OTU_1567_ SAR11_ Clade_I_unclassified	0.81	0.004	0.27	Small	65.2	Alphaproteobacteria	SAR11	SAR11 Clade 1a
	Nelson	Marine	OTU_1567_SAR11_Clade_I_unclassified	0.89	0.001	0.22	Small	69.5	Alphaproteobacteria	SAR11	SAR11 Clade 1a
	Nelson	Marine	OTU_1392_SAR11_Clade_I_unclassified	0.88	0.001	0.14	Small	84.1	Alphaproteobacteria	SAR11	SAR11 Clade I
	Churchill	Marine	OTU_1714_ Clade_I_unclassified	0.84	0.004	0.14	Small	80	Alphaproteobacteria	SAR11	SAR11 Clade I
	Nelson	Marine	OTU_1714_SAR11_Clade_I_unclassified	0.9	0.001	0.17	Small	79.6	Alphaproteobacteria	SAR11	SAR11 Clade I
	Nelson	Marine	OTU_60_SAR11_Clade_I_unclassified	0.88	0.001	0.29	Small	74.5	Alphaproteobacteria	SAR11	SAR11 Clade I
	Churchill	Marine	OTU_581_ SAR11_ Clade_Ia	0.87	0.004	12.08	Small	67.4	Alphaproteobacteria	SAR11	SAR11 Clade Ia
	Nelson	Marine	OTU_581_SAR11_Clade_Ia	0.91	0.001	13.62	Small	68.8	Alphaproteobacteria	SAR11	SAR11 Clade Ia
	Nelson	Marine	OTU_518_SAR11_Clade_I_unclassified	0.83	0.001	0.14	Small	79.3	Alphaproteobacteria	SAR11	SAR11 Clade II
	Nelson	Estuary	OTU_624_SAR11_Clade_III_ge	0.81	0.007	3.4	Small	70.6	Alphaproteobacteria	SAR11	SAR11 Clade III
	Nelson	Estuary	OTU_713_SAR11_Clade_III_ge	0.82	0.004	2.8	Small	72.2	Alphaproteobacteria	SAR11	SAR11 Clade III	0.97
	Nelson	Marine	OTU_4260_SAR11_Clade_III_ge	0.83	0.001	0.57	Small	67.4	Alphaproteobacteria	SAR11	SAR11 Clade III
	Nelson	Marine	OTU_1743_SAR11_Clade_I_ge	0.87	0.001	0.16	Small	81.3	Alphaproteobacteria	SAR11	unclassified	0.94
	Churchill	Marine	OTU_1329_ Alphaproteobacteria_unclassified*	0.81	0.004	0.16	Small	66.6	Alphaproteobacteria	unclassified	unclassified	0.93
	Nelson	Marine	OTU_1853_Flavobacteriaceae_unclassified	0.8	0.001	0.12	Small	78.9	Bacteroidia	Flavobacteriales	unclassified	0.93
	Churchill	Marine	OTU_162_ KI89A_clade_ge	0.85	0.005	0.3	Small	73.6	Gammaproteobacteria	Pseudomonadales	K189 clade
	Nelson	Marine	OTU_305_Litoricola	0.9	0.001	0.17	Small	67.7	Gammaproteobacteria	Pseudomonadales	Litoricola
	Nelson	Marine	OTU_2088_Nitrincolaceae uncultured	0.86	0.001	1.07	Small	65.6	Gammaproteobacteria	Pseudomonadales	Nitrincolaceae UC_Env
	Nelson	Marine	OTU_2222_Nitrincolaceae uncultured	0.83	0.001	1.47	Small	65.4	Gammaproteobacteria	Pseudomonadales	Nitrincolaceae UC_Env
	Nelson	Marine	OTU_34_OM182_clade_ge	0.81	0.001	0.54	Small	68.8	Gammaproteobacteria	Pseudomonadales	OM182 clade
	Churchill	Marine	OTU_4074_ OM182_clade_ge	0.87	0.004	0.86	Small	69	Gammaproteobacteria	Pseudomonadales	OM182 clade
	Churchill	Marine	OTU_125_ SAR86_clade_ge	0.85	0.005	1.04	Small	65.2	Gammaproteobacteria	Pseudomonadales	SAR86
	Churchill	Marine	OTU_1416_ SAR86_clade_ge	0.84	0.004	0.77	Small	65.9	Gammaproteobacteria	Pseudomonadales	SAR86
	Churchill	Marine	OTU_187_ SAR86_clade_ge	0.84	0.004	0.61	Small	68	Gammaproteobacteria	Pseudomonadales	SAR86
	Churchill	Marine	OTU_6314_ SAR86_clade_ge	0.86	0.004	0.14	Small	72.9	Gammaproteobacteria	Pseudomonadales	SAR86
	Churchill	Marine	OTU_2797_ SAR86_clade_ge	0.82	0.004	0.13	Small	66.8	Gammaproteobacteria	Pseudomonadales	SAR86
	Nelson	Marine	OTU_1817	0.86	0.001	0.12	Small	80	Gammaproteobacteria	Pseudomonadales	SUP05 cluster
	Nelson	Marine	OTU_1525_SUP05_cluster	0.81	0.001	7.86	Small	71.2	Gammaproteobacteria	Pseudomonadales	SUP05 cluster
	Nelson	Marine	OTU_2605_SUP05_cluster	0.86	0.001	0.93	Small	72.8	Gammaproteobacteria	Pseudomonadales	SUP05 cluster
	Nelson	Marine	OTU_1947_Gammaproteobacteria_unclassified	0.91	0.001	0.29	Small	79.6	Gammaproteobacteria	Pseudomonadales	SUP05 cluster
	Nelson	Marine	OTU_1819_Thioglobaceae_unclassified	0.84	0.001	0.77	Small	71.1	Gammaproteobacteria	Pseudomonadales	Thioglobaceae unclassified	SUP05
	Nelson	Estuary	OTU_1819_Thioglobaceae_unclassified	0.84	0.005	0.5	Small	72.3	Gammaproteobacteria	Pseudomonadales	Thioglobaceae unclassified
	Nelson	Marine	OTU_2622_Thioglobaceae_unclassified	0.9	0.001	0.13	Small	82.1	Gammaproteobacteria	Pseudomonadales	Thioglobaceae_unclassified	0.96
	Nelson	Marine	OTU_623_Thioglobaceae_unclassified	0.86	0.001	3.39	Small	72.2	Gammaproteobacteria	Pseudomonadales	Thioglobaceae_unclassified
	Nelson	Estuary	OTU_623_Thioglobaceae_unclassified	0.83	0.003	2	Small	70.8	Gammaproteobacteria	Pseudomonadales	Thioglobaceae_unclassified
	Nelson	Marine	OTU_725_Thioglobaceae_unclassified	0.82	0.001	0.96	Small	70.5	Gammaproteobacteria	Pseudomonadales	Thioglobaceae_unclassified
	Nelson	Marine	OTU_816_Thioglobaceae_unclassified	0.94	0.001	0.43	Small	73.5	Gammaproteobacteria	Pseudomonadales	Thioglobaceae_unclassified
	Nelson	Marine	OTU_1455_Gammaproteobacteria_unclassified	0.83	0.001	0.49	Small	71.9	Gammaproteobacteria	Pseudomonadales	unclassified	0.96
	Nelson	Marine	OTU_1491_Gammaproteobacteria_unclassified	0.83	0.001	0.27	Small	70.8	Gammaproteobacteria	Pseudomonadales	unclassified	0.94
	Nelson	Marine	OTU_2607_Gammaproteobacteria_unclassified	0.87	0.001	0.11	Small	73.3	Gammaproteobacteria	Pseudomonadales	unclassified
	Churchill	Marine	OTU_690_	0.92	0.004	0.12	Small	66.1	Gammaproteobacteria	Steroidobacterales	Woeseia
	Nelson	Marine	OTU_1986_Gammaproteobacteria_unclassified	0.88	0.001	0.17	Small	71.8	Gammaproteobacteria	unclassified	unclassified	0.95
	Nelson	Marine	OTU_1919_Gammaproteobacteria_unclassified	0.93	0.001	0.11	Small	87.6	Gammaproteobacteria	unclassified	unclassified	0.96
	Nelson	Marine	OTU_1593_Gammaproteobacteria_unclassified	0.91	0.001	0.38	Small	80.7	Gammaproteobacteria	unclassified	unclassified	0.95
	Nelson	Estuary	OTU_64_Marinimicrobia_(SAR406_clade)_ge	0.82	0.003	0.1	Small	76.4	Marinimicrobia	SAR406	unclassified

## Sheet: Explanation
Supplementary Data S3.
Indicator OTUs for size fractions. Indicator species of the size fractions in the Marine and estuarine samples from the Nelson transect and Marine Samples from the Churchill transect The statistic value (Stat) is the IndVal index (func = "IndVal.g"), which represents the association strength between an OTU and its size fraction (0 = no association; 1 = strong association), and P-value indicates s…
