# Supplementary material for: A microbial perspective on the local influence of Arctic rivers and estuaries on Hudson Bay (Canada)
Source: Oxford University Press journal article supplement (doi:10.1525/elementa.2021.00009), 2022-01-01
Supplement: supplementary_figures_s1_s9.docx [file supplementary_figures_s1_s9.docx]

Supplementary Figures

1 to 9

**A microbial perspective on the local influence of Arctic rivers and estuaries on Hudson Bay (Canada)**

**Carlee Morency1, Loïc Jacquemot1,2, Marianne Potvin2, Connie Lovejoy1,2**

1Département de Biologie, Université Laval, Québec, QC, Canada.

2Institut de Biologie Intégrative et des Systèmes (IBIS), Université Laval, Québec, QC, Canada.

FigureS1


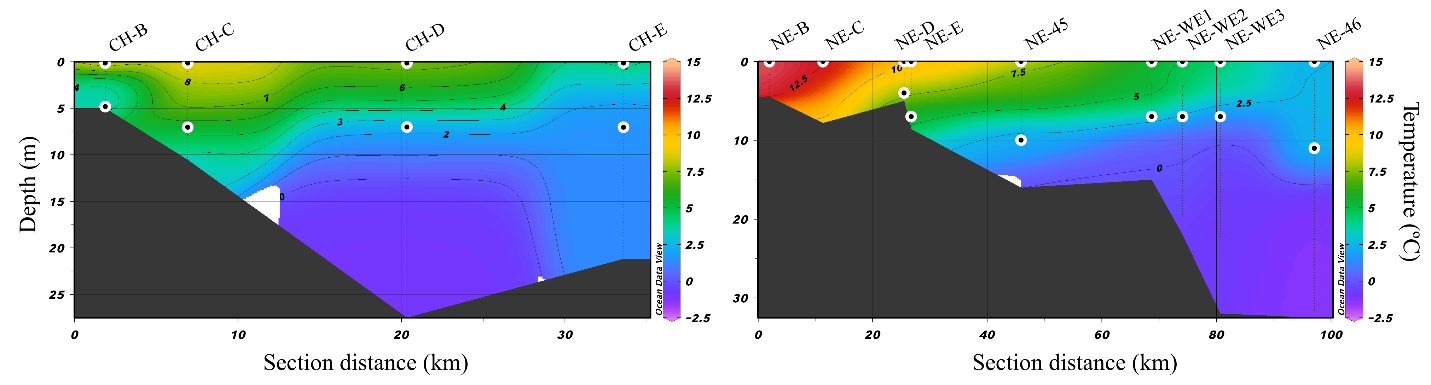


**Figure S1**: **Vertical temperature profiles from CTD data.** The black dots with a white border indicate the position of the samples in the water column. Nelson transect is on the left (NE stations); Churchill transect, on the right (CH stations). Figure created with Ocean Data View Software.

Figure S2


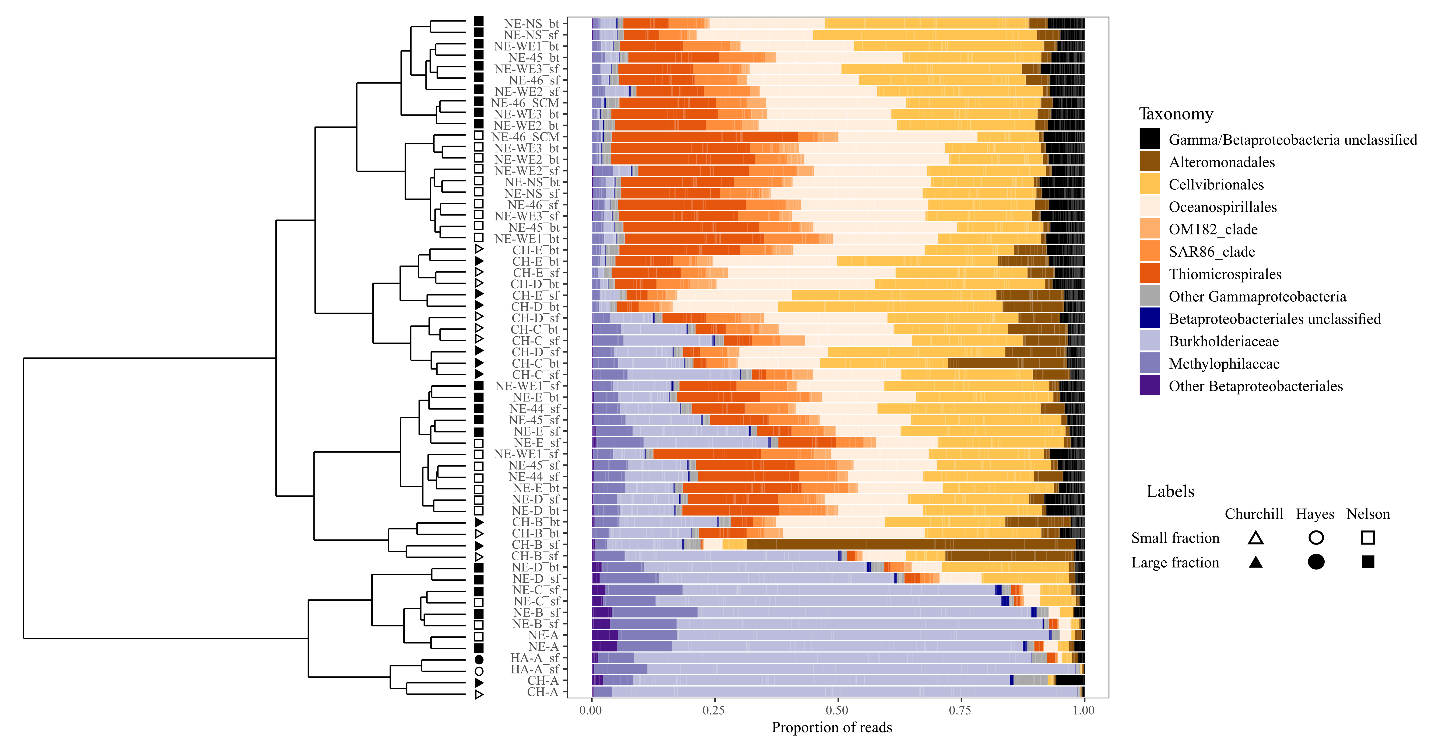


**Figure S2.** **Relative rDNA abundances of major categories of Gammaproteobacteria.** The order was defined by the hierarchical cluster analysis based on the Bray-Curtis indices from the rDNA samples (Figure 1, main text). Large fraction samples are in solid symbols; small fraction, in open symbols.

Figure S3


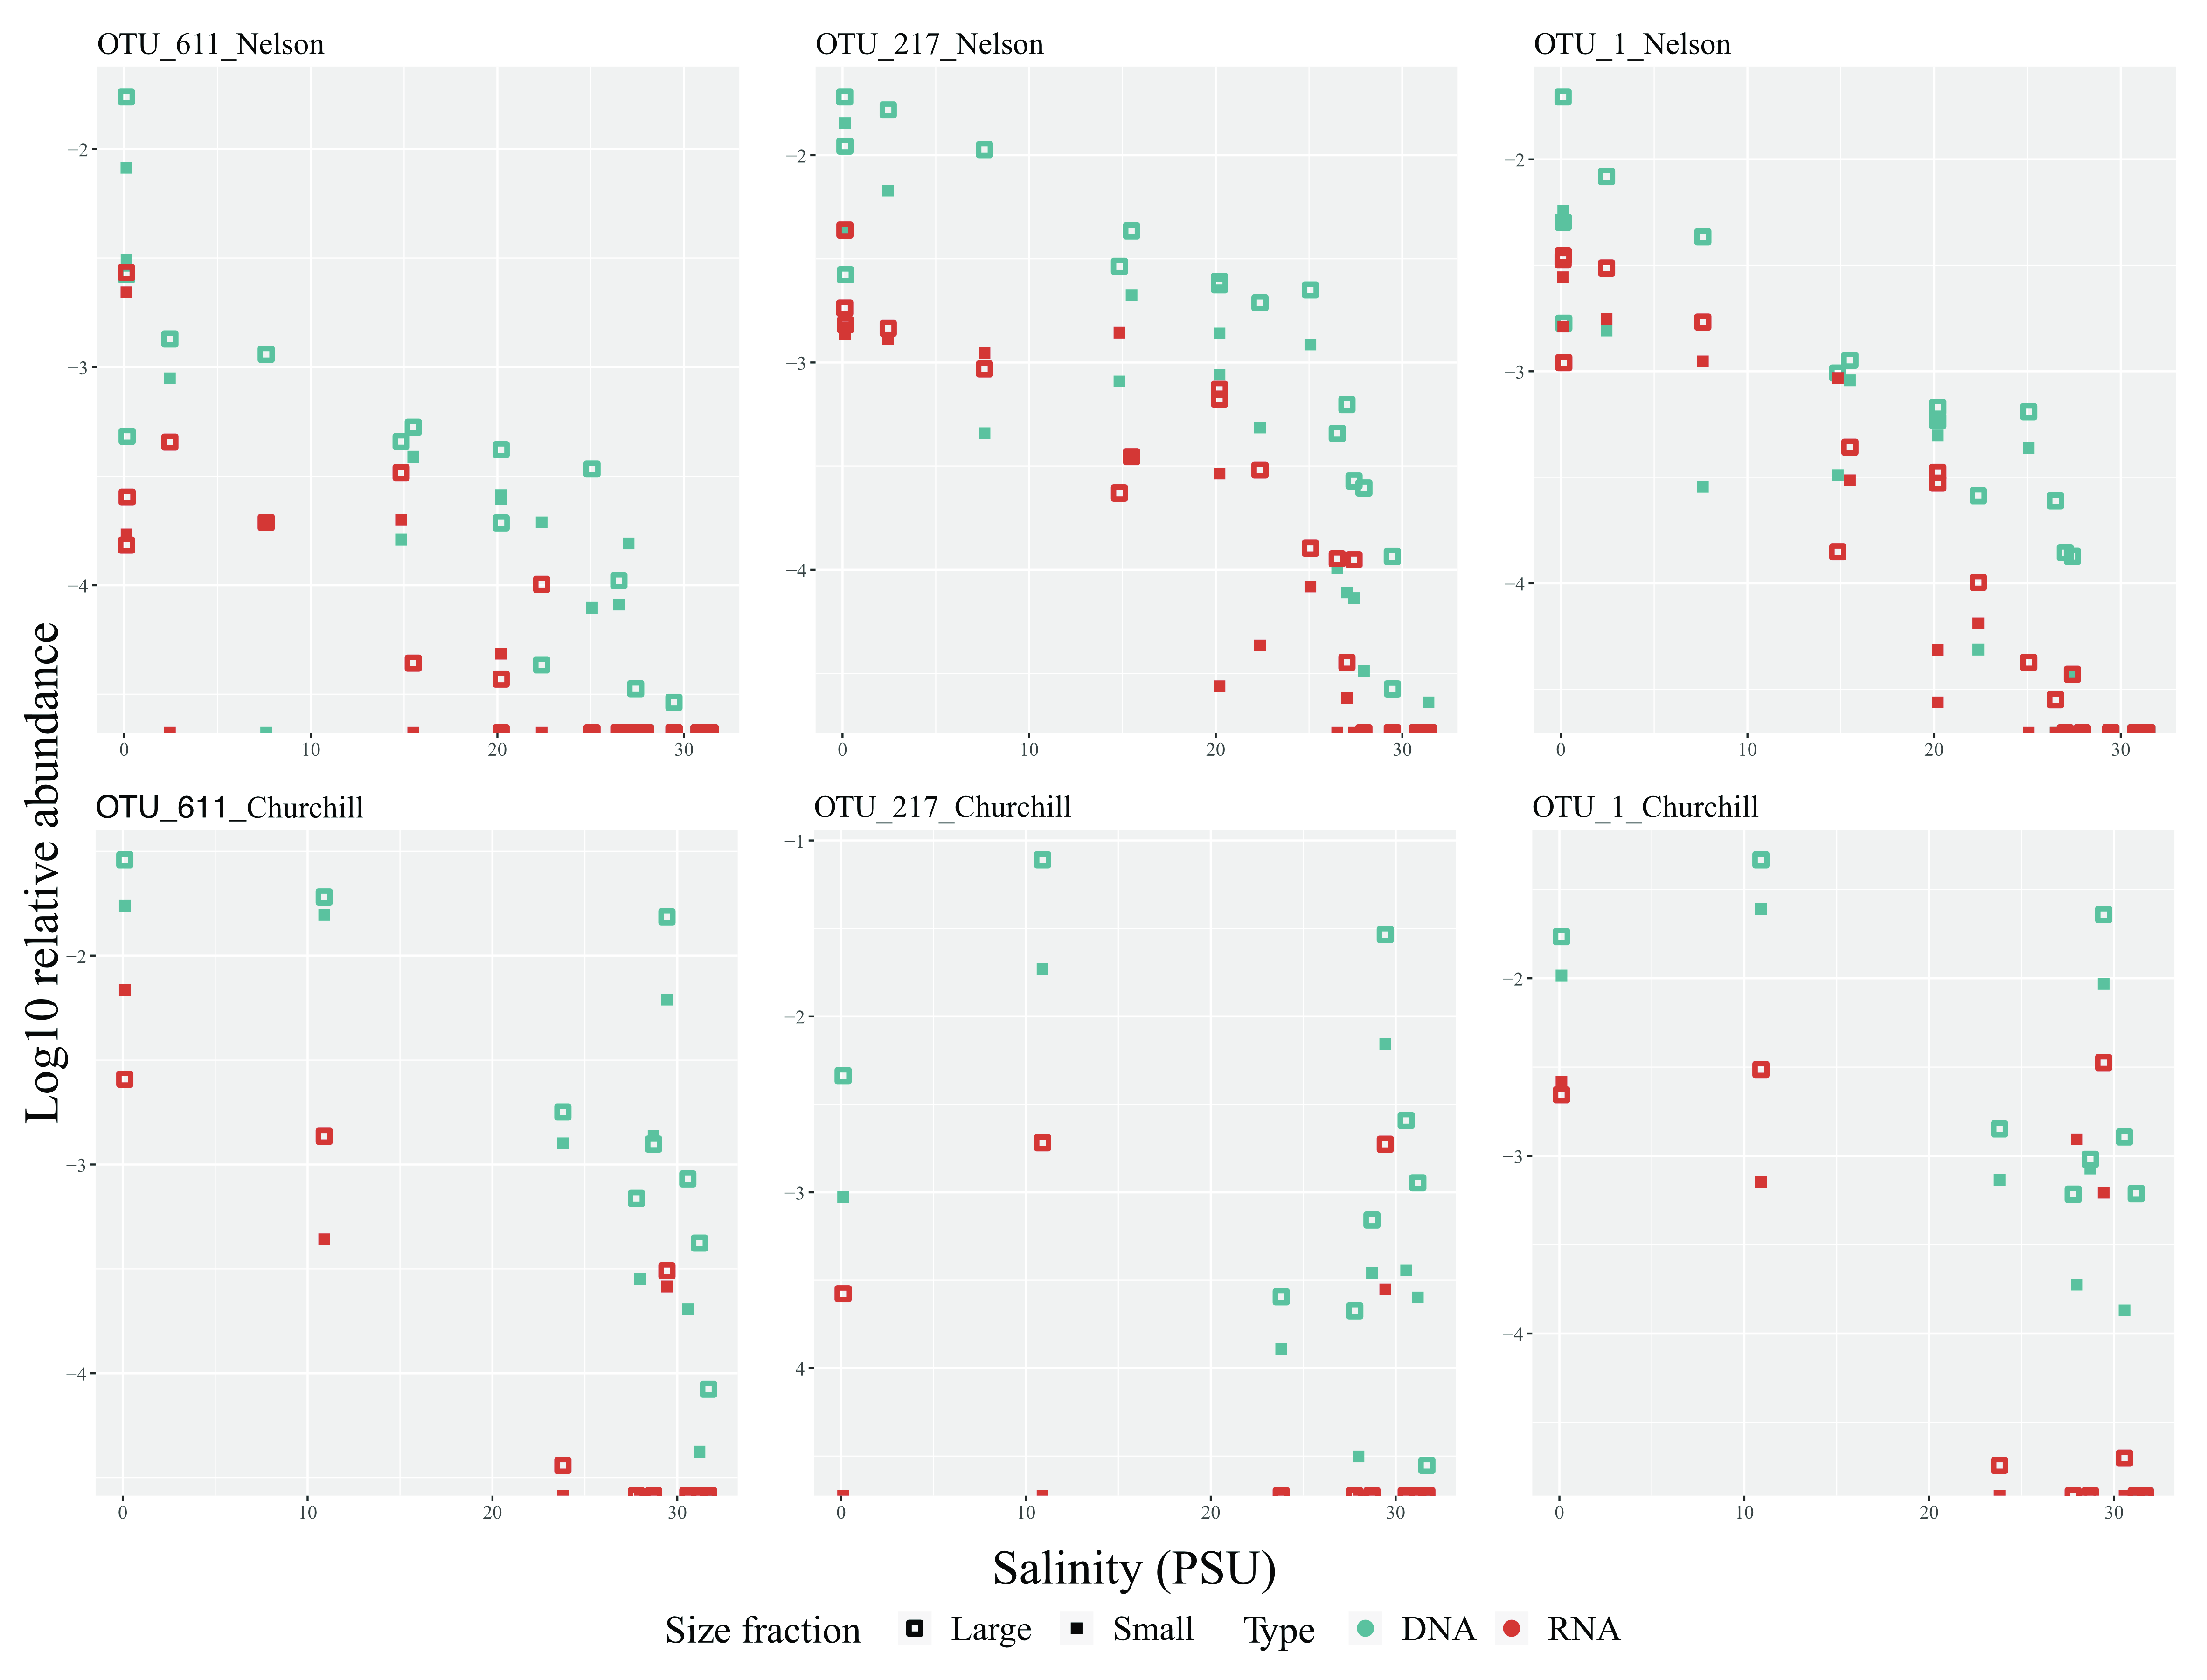


**Figure S3.** **Relative abundances of the three most abundant cyanobacteria OTUs along the two transects.** Top panels are from the Nelson transect; lower panels are from the Churchill transect. All values arelog10 of the reads from rDNA and rRNA.

Figure S4.


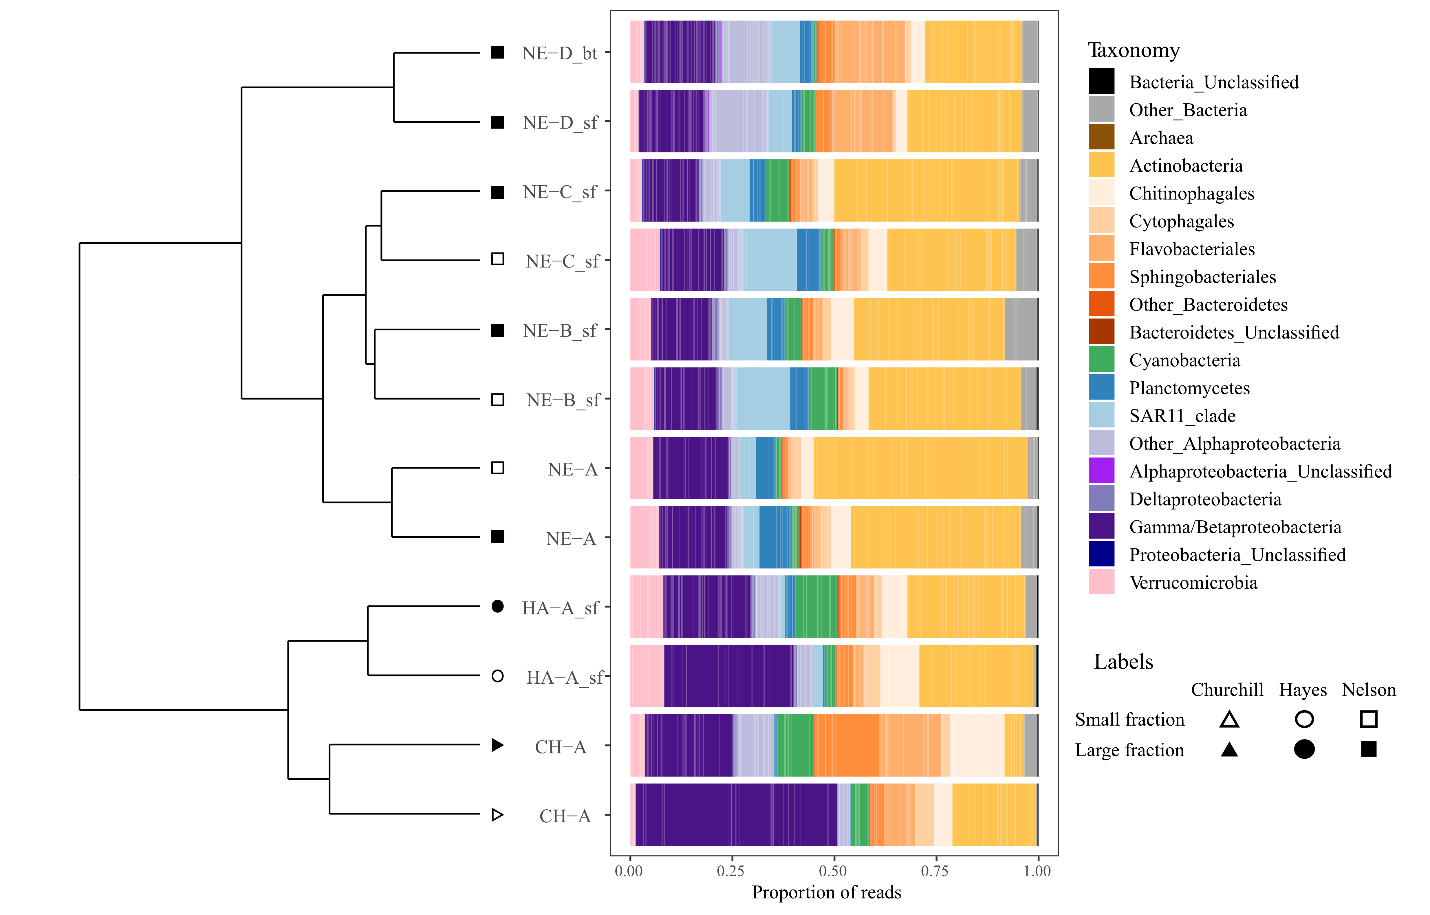


**Figure S4. Relative rDNA abundances of major bacterial groups in the riverine cluster samples.** The riverine samples were defined by the hierarchical cluster analysis based on the Bray-Curtis indices from the rDNA samples (Figure 1, main text).

Figure S5


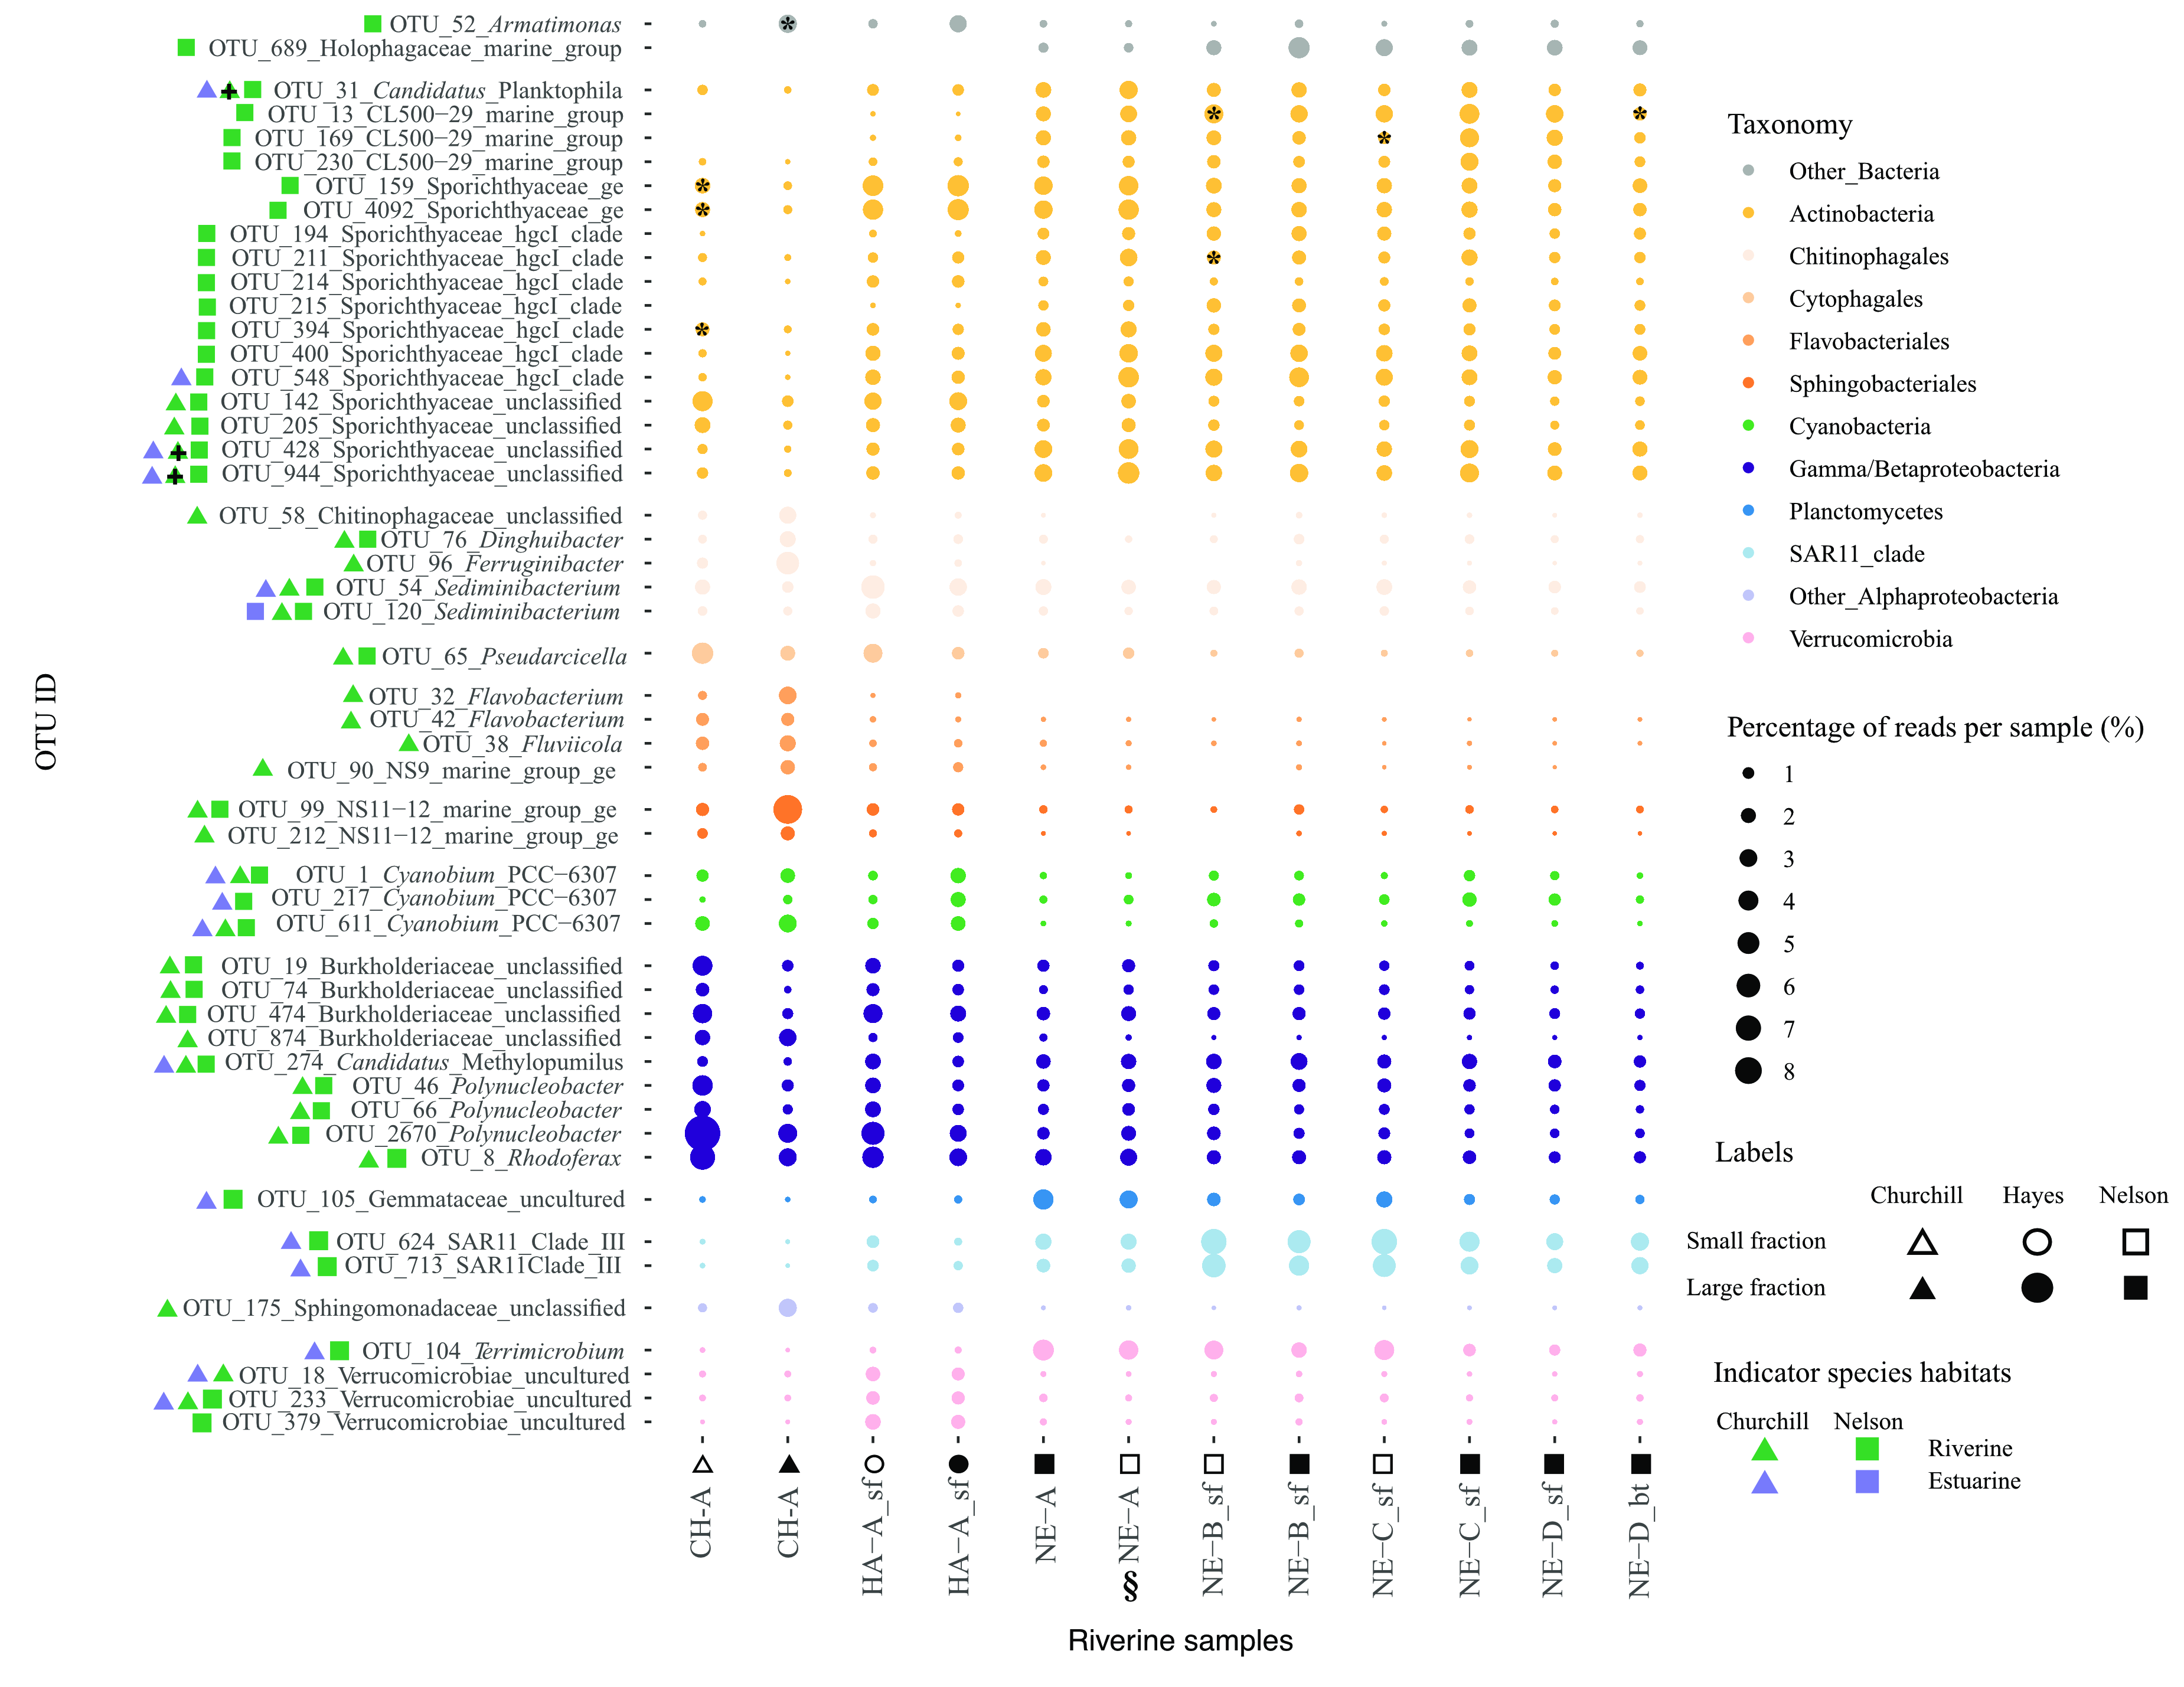


**Figure S5. Most abundant OTUs (percentage of reads 1%) in Churchill, Hayes and Nelson riverine samples.** The riverine samples were defined by the hierarchical cluster analysis based on the Bray-Curtis indexes from the rDNA samples. OTUs not found in a given sample rRNA library (percentage of rDNA reads 1%) are indicated by an asterisk in the circle if not found in the specific sample. The “§” symbol above the Nel_DNA_S_NE-A_sf sample indicates that its corresponding rRNA sample was not available. A + sign in the habitat symbol on the right indicates that although the rDNA classified it as an indicator, the taxon was not recovered from the rRNA from that habitat.

Supplementary Figure S6.


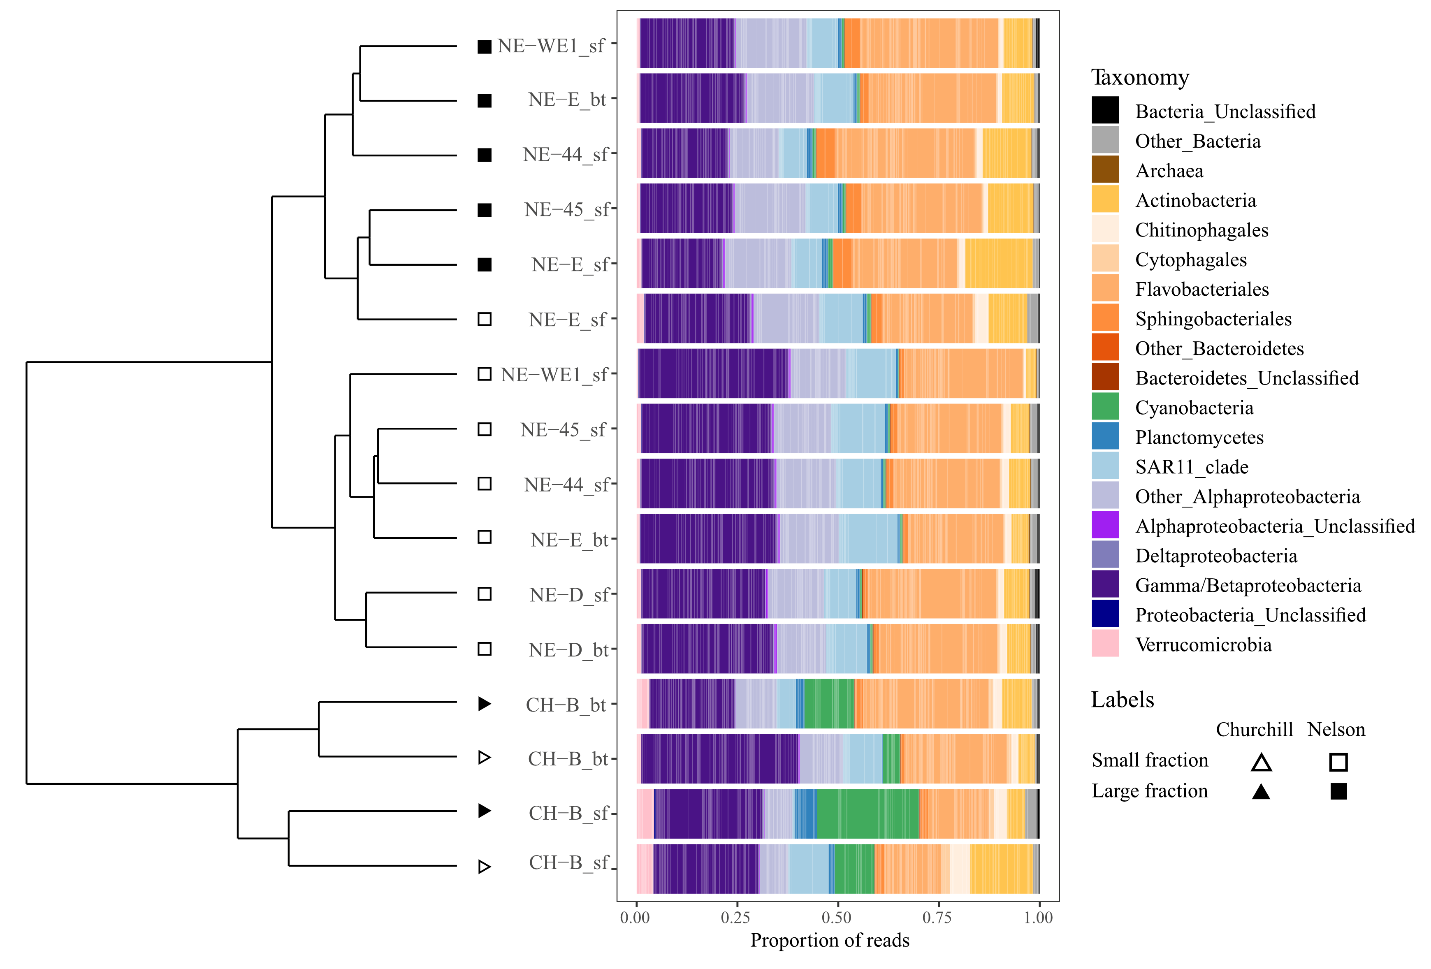


**Figure S6. Relative rDNA abundances of major bacterial groups in the estuarine cluster samples.** The estuarine samples were defined by the hierarchical cluster analysis based on the Bray-Curtis indexes from the rDNA samples (Figure 1, main text).

Figure S7.


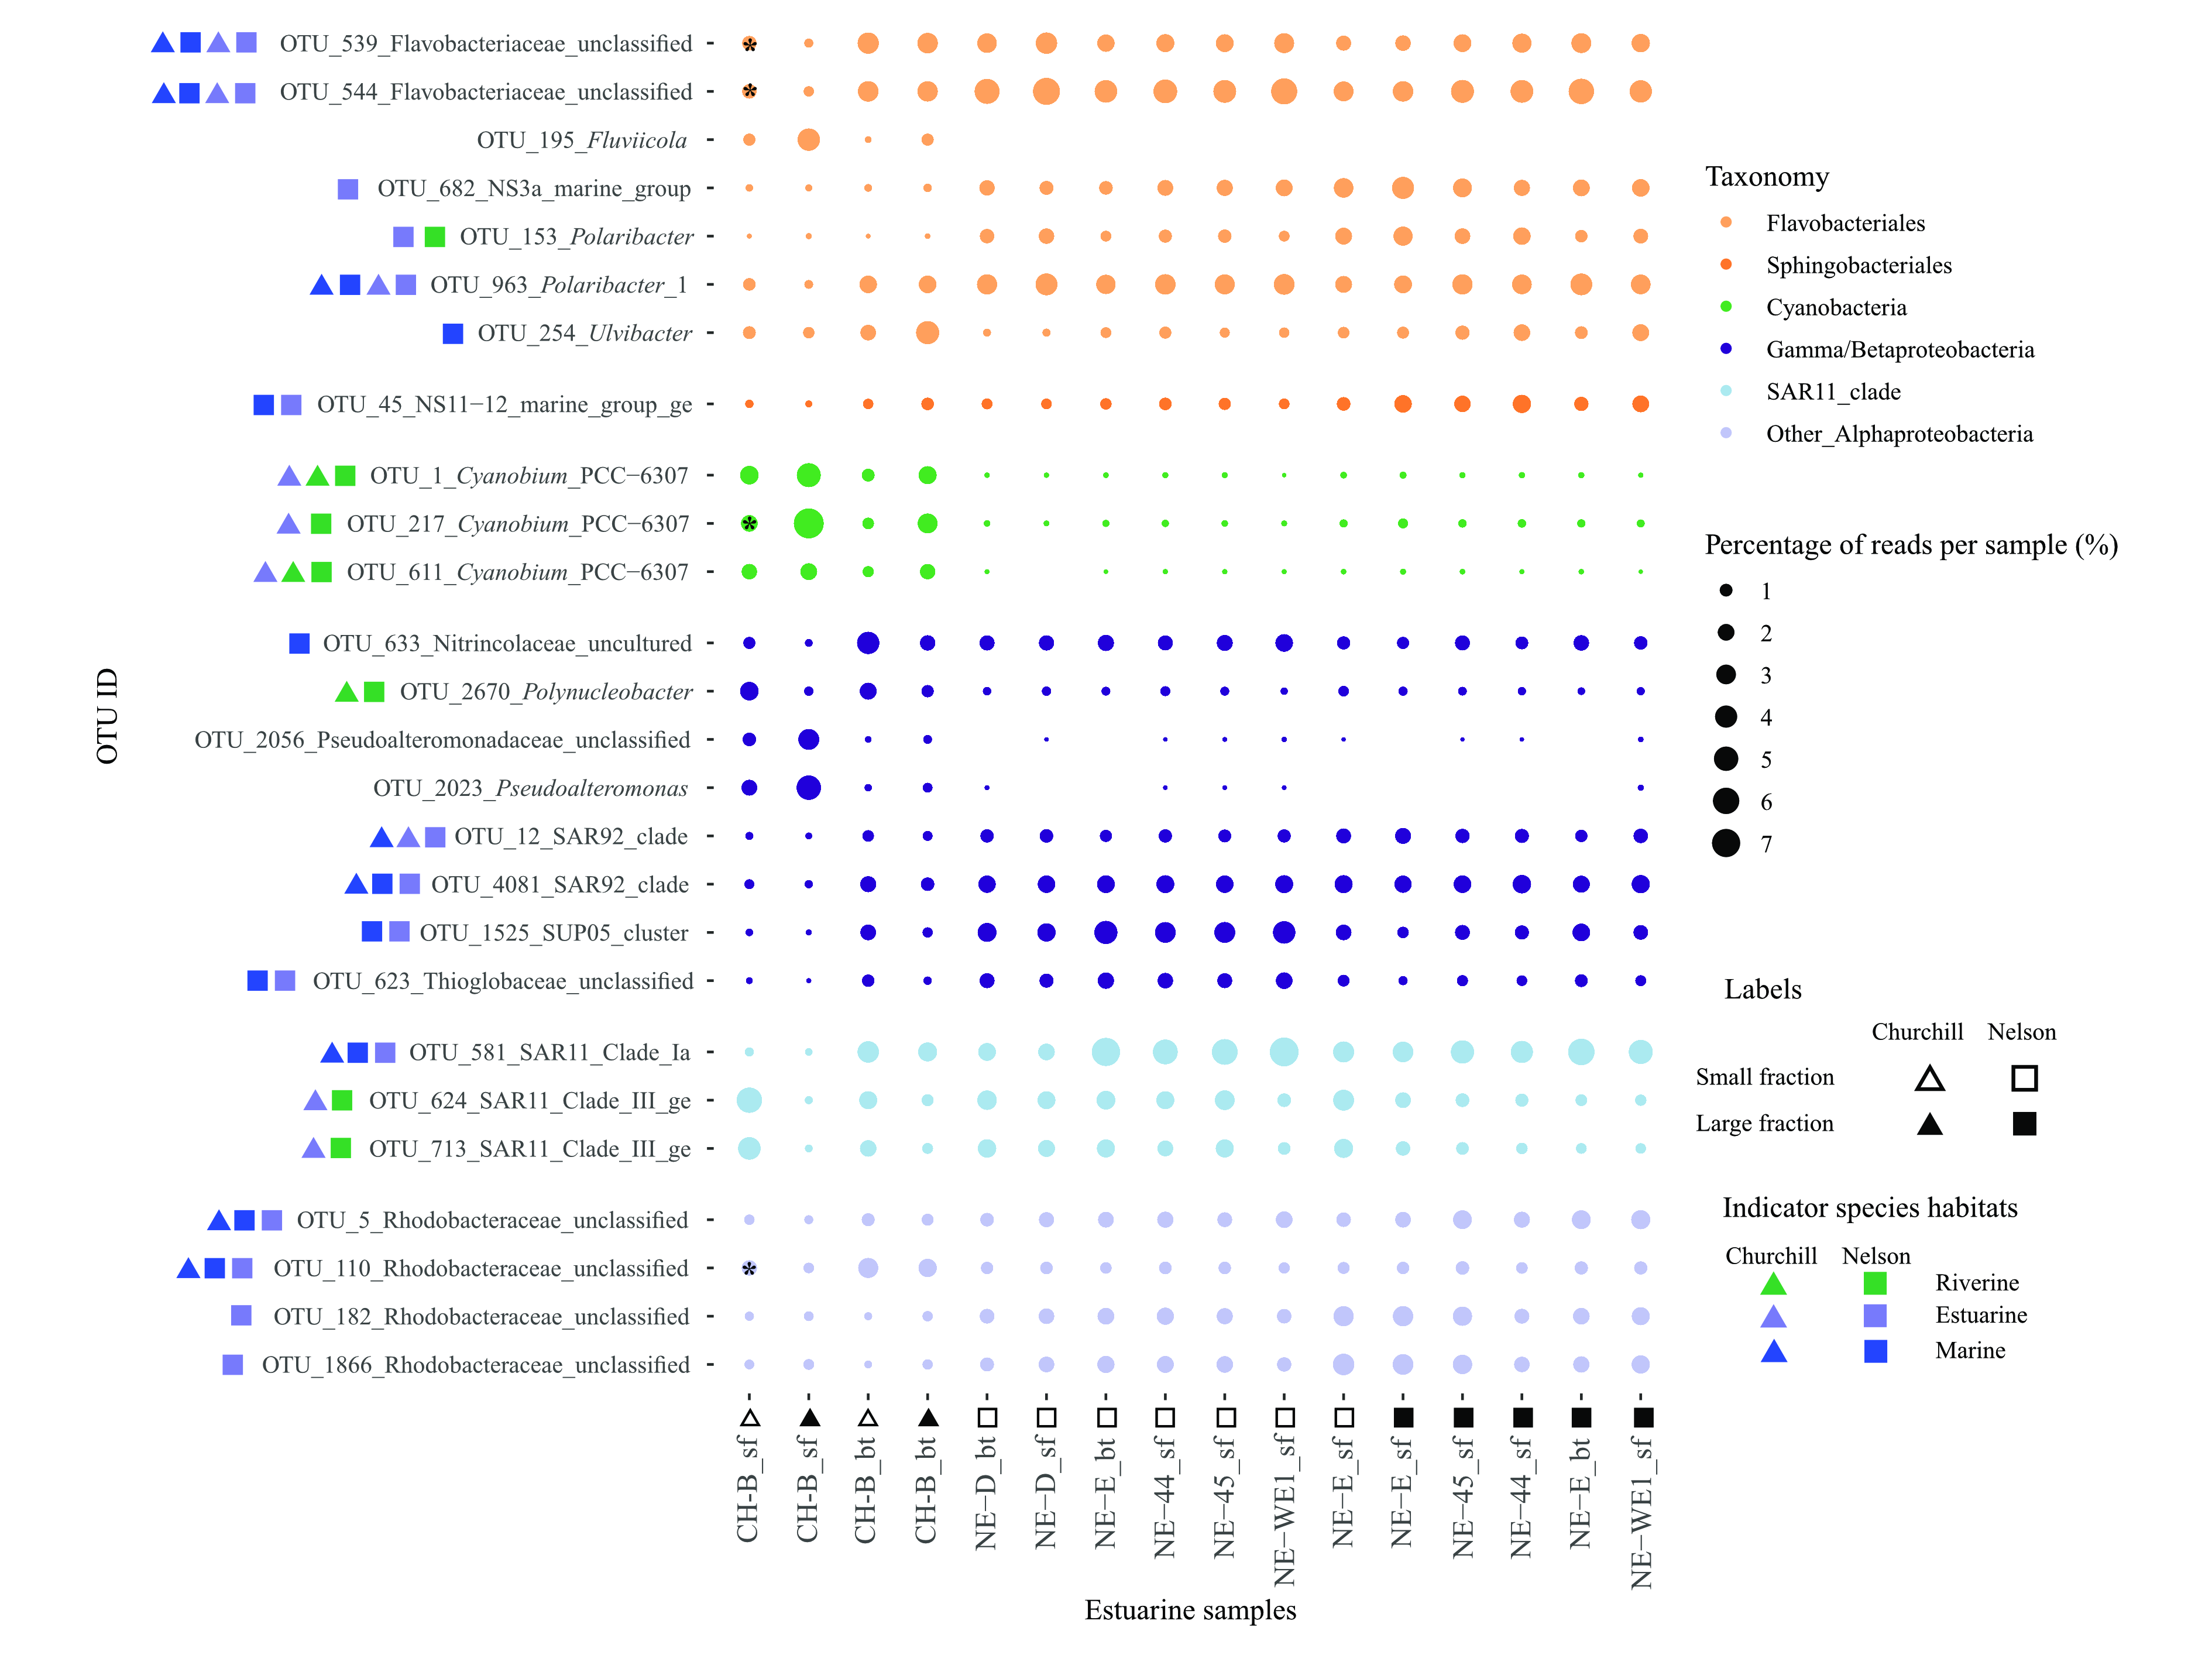


**Figure S7. Most abundant OTUs (percentage of reads 1%) in Churchill and Nelson estuarine samples.** The estuarine samples were defined by the hierarchical cluster analysis based on the Bray-Curtis indexes from the rDNA with percentage of reads 1%.OTUs not found in a given sample rRNA library (percentage of rDNA reads 1%) are indicated by an asterisk in the circle.

Figure S8.


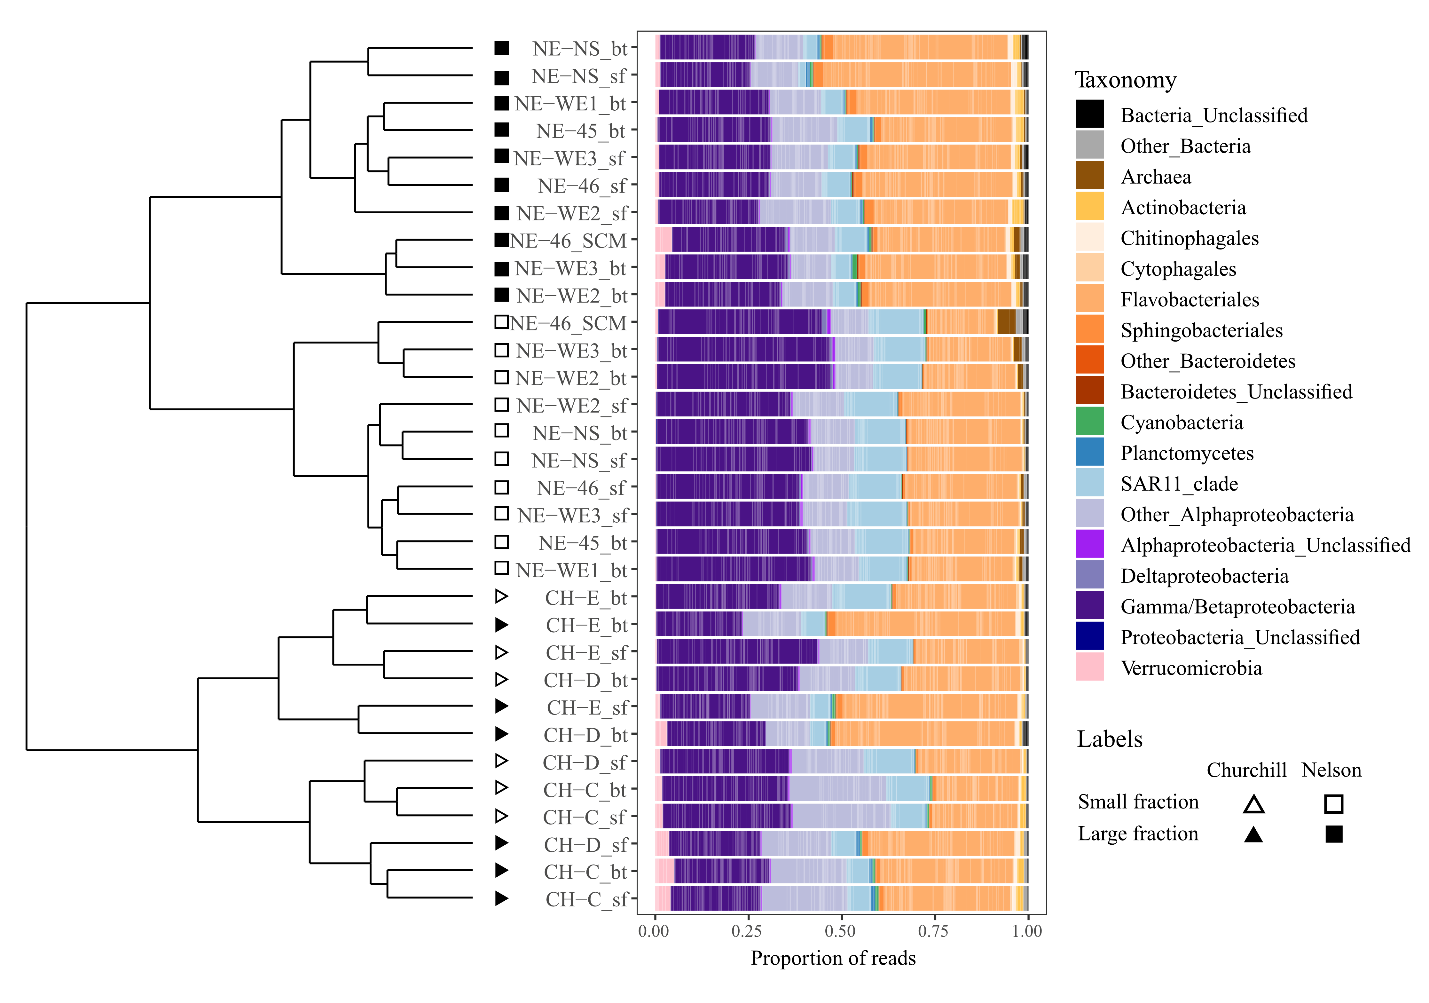


**Figure S8. Relative rDNA abundances of major bacterial groups in the marine cluster samples.** The marine samples were defined by the hierarchical cluster analysis based on the Bray-Curtis indexes from the rDNA samples (Figure 1, main text).

Figure S9.


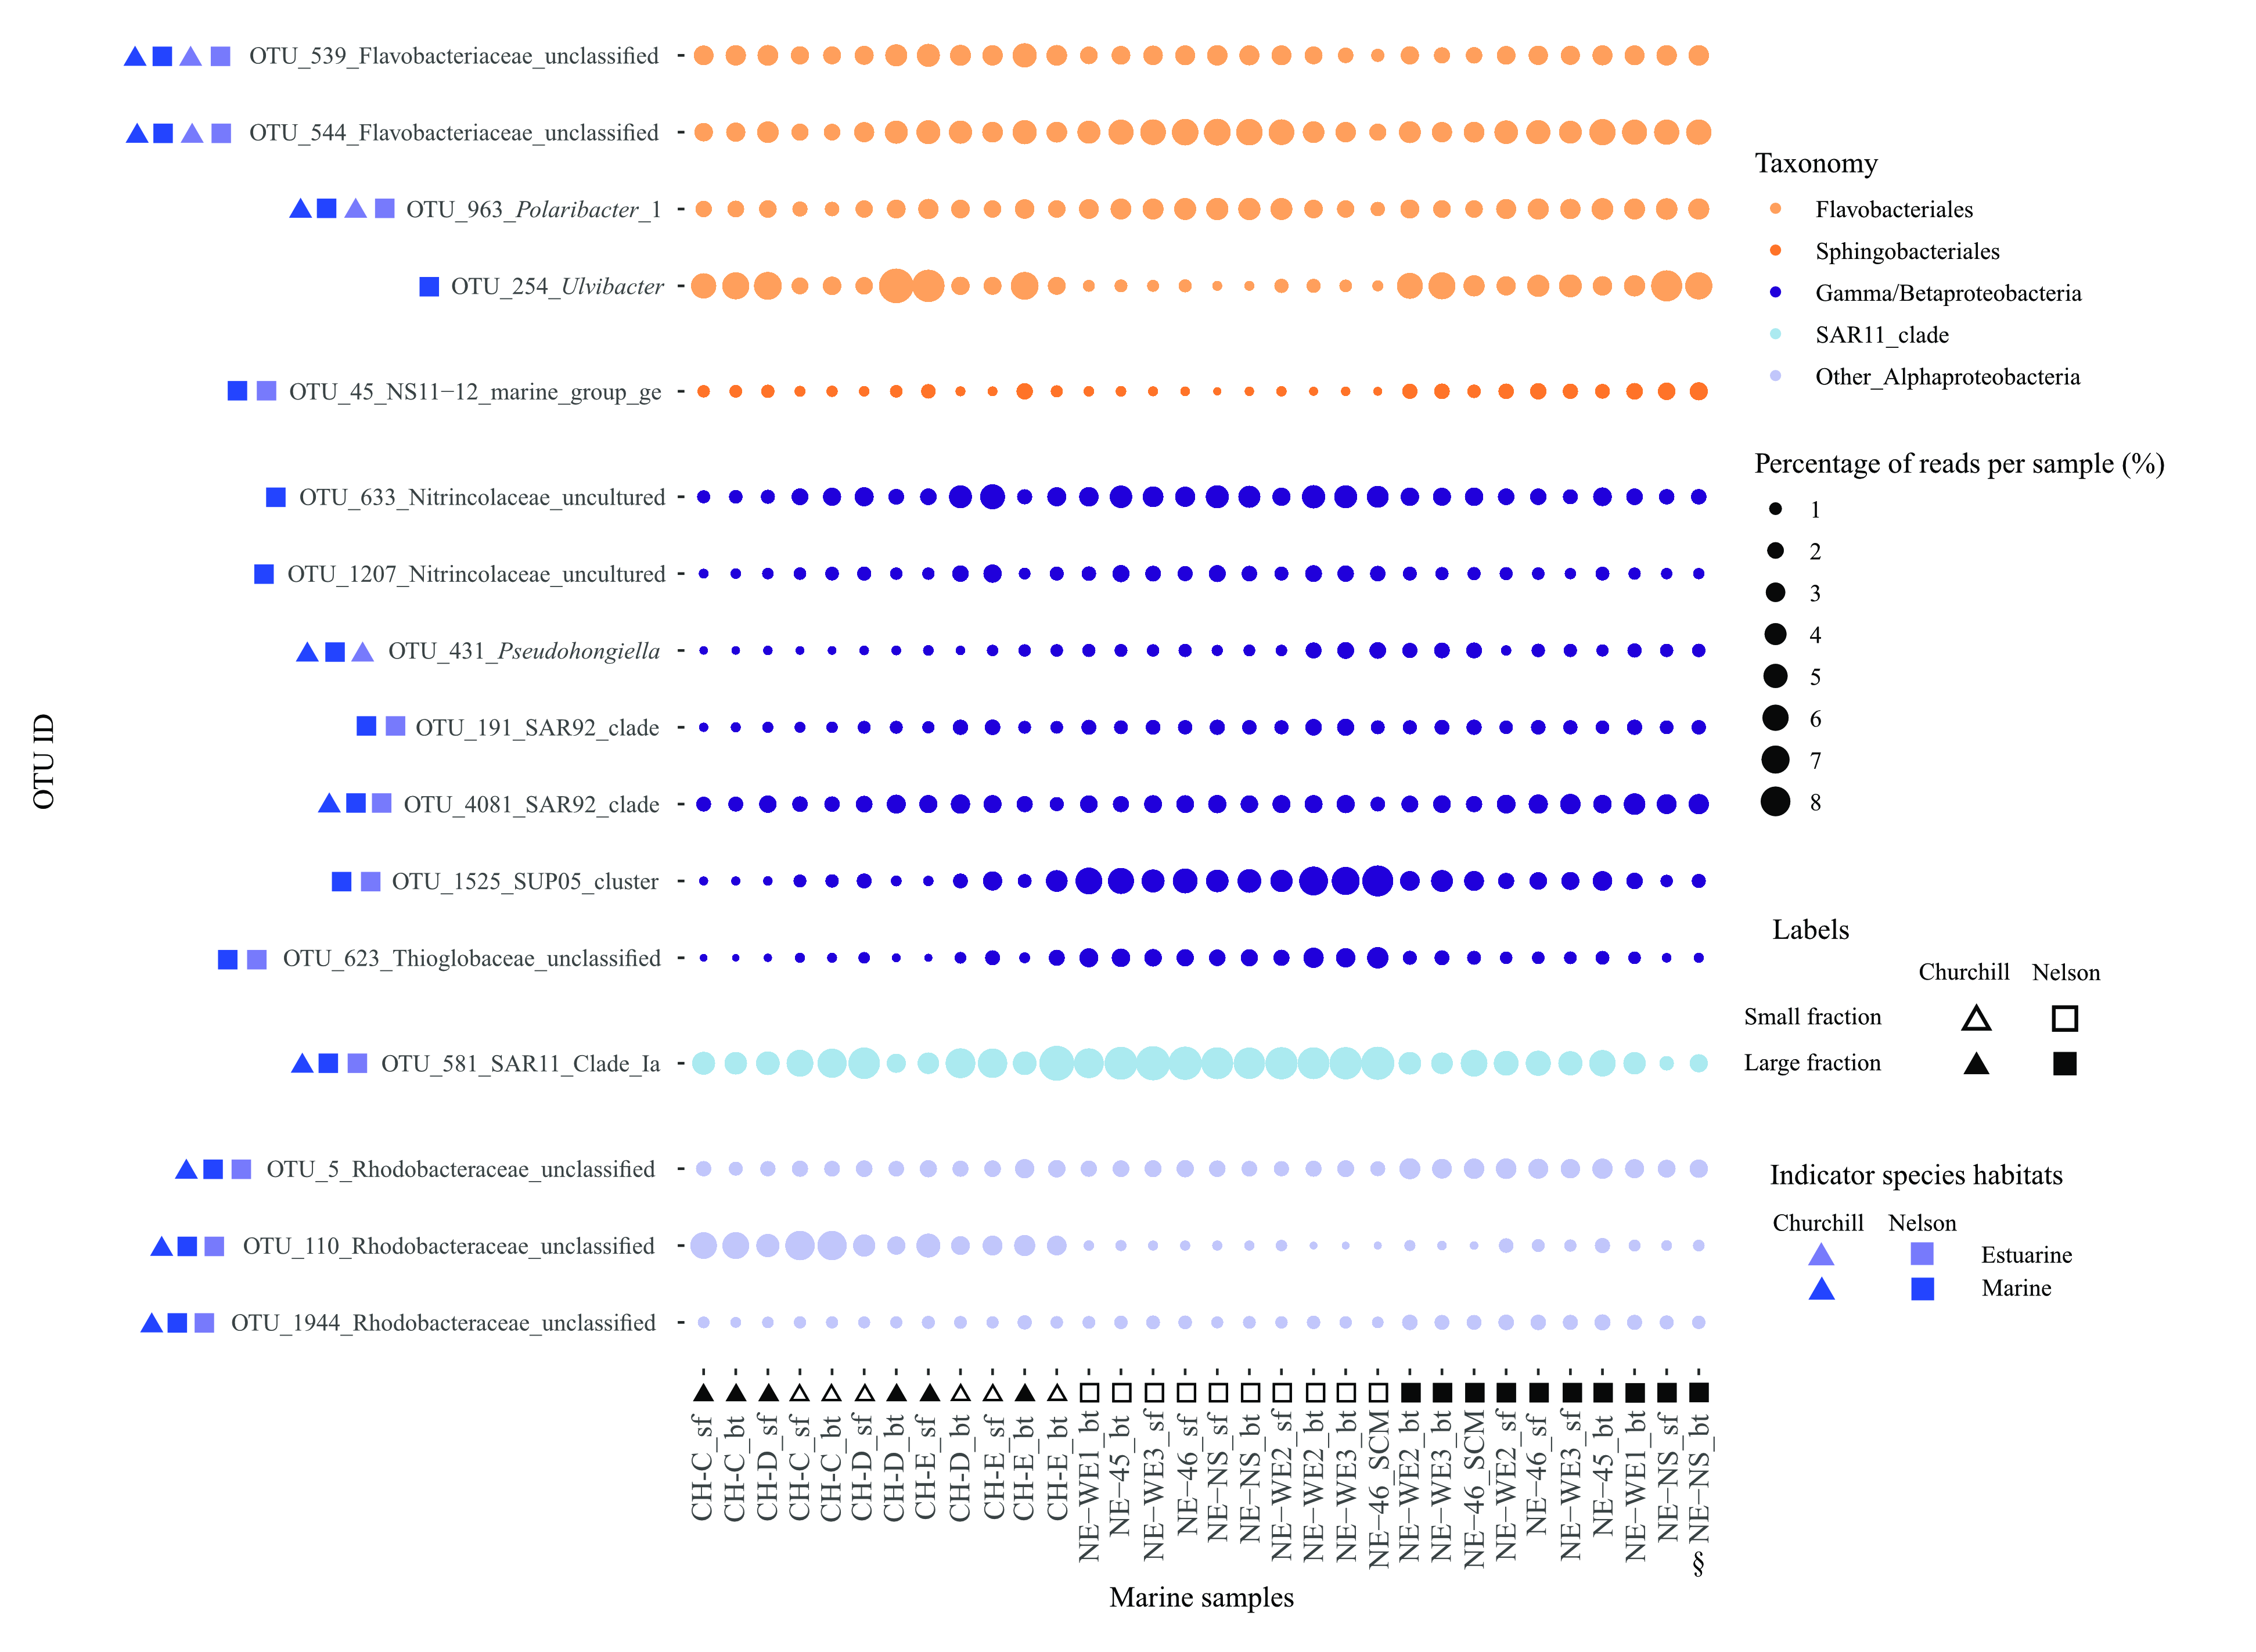


**Figure S9. Most abundant OTUs (percentage of reads 1%) in Churchill and Nelson marine samples.** The marine samples were defined by the hierarchical cluster analysis based on the Bray-Curtis indexes from the rDNA samples. The “§” symbol above the Nel_DNA_L_NE-NS_bt sample indicates that its corresponding rRNA sample was not available.
